1           **Disturbed laterality of non-rapid eye movement sleep**  
2           **oscillations in post-stroke human sleep: a pilot study**

3  
4           Benjamin K. Simpson, M.D.<sup>1,†</sup>, Rohit Rangwani, M.S.<sup>2,3,†</sup>, Aamir Abbasi, Ph.D.<sup>2</sup>,  
5           Jeffrey M. Chung, M.D.<sup>1</sup>, Chrystal M. Reed, M.D., Ph.D.<sup>1, #</sup>, Tanuj Gulati, Ph.D.<sup>1,2,3,4, #</sup>

6  
7  
8           <sup>1</sup> Department of Neurology, Cedars-Sinai Medical Center, Los Angeles, CA.

9           <sup>2</sup> Center for Neural Science and Medicine, Department of Biomedical Sciences, Cedars-Sinai  
10          Medical Center, Los Angeles, CA.

11          <sup>3</sup> Bioengineering Graduate Program, Department of Bioengineering, Henry Samueli School of  
12          Engineering, University of California - Los Angeles, Los Angeles, CA.

13          <sup>4</sup> Department of Medicine, David Geffen School of Medicine, University of California-Los Angeles,  
14          Los Angeles, CA.

15  
16          <sup>†</sup> These authors contributed equally and share first authorship

17          <sup>#</sup> These authors contributed equally

18  
19          Article type: Brief research report

20          Correspondence: [tanuj.gulati@csmc.edu](mailto:tanuj.gulati@csmc.edu)

21          Word Count

22          Abstract: 238; Text : 4994

25 **Abstract (250 words)**

26

27 Sleep is known to promote recovery post-stroke. However, there is a paucity of data profiling  
28 sleep oscillations post-stroke in the human brain. Recent rodent work showed that resurgence of  
29 physiologic spindles coupled to sleep slow oscillations(SOs) and concomitant decrease in  
30 pathological delta( $\delta$ ) waves is associated with sustained motor performance gains during stroke  
31 recovery. The goal of this study was to evaluate bilaterality of non-rapid eye movement (NREM)  
32 sleep-oscillations (namely SOs,  $\delta$ -waves, spindles and their nesting) in post-stroke patients  
33 versus healthy control subjects. We analyzed NREM-marked electroencephalography (EEG) data  
34 in hospitalized stroke-patients (n=5) and healthy subjects (n=3) from an open-sourced dataset.  
35 We used a laterality index to evaluate symmetry of NREM oscillations across hemispheres. We  
36 found that stroke subjects had pronounced asymmetry in the oscillations, with a predominance of  
37 SOs,  $\delta$ -waves, spindles and nested spindles in one hemisphere, when compared to the healthy  
38 subjects. Recent preclinical work classified SO-nested spindles as restorative post-stroke and  $\delta$ -  
39 wave-nested spindles as pathological. We found that the ratio of SO-nested spindles laterality  
40 index to  $\delta$ -wave-nested spindles laterality index was lower in stroke subjects. Using linear mixed  
41 models (which included random effects of concurrent pharmacologic drugs), we found large and  
42 medium effect size for  $\delta$ -wave nested spindle and SO-nested spindle, respectively. Our results  
43 indicate considering laterality index of NREM oscillations might be a useful metric for assessing  
44 recovery post-stroke and that factoring in pharmacologic drugs may be important when targeting  
45 sleep modulation for neurorehabilitation post-stroke.

46

47 **Keywords:** Stroke, Sleep, EEG

48

49

## 50 Introduction

51

52 Stroke is a leading cause of motor disability world-wide, and despite advances in  
53 neurorehabilitation, there is a lack of widely adopted therapies that target plasticity and functional  
54 outcomes remain inconsistent<sup>1-3</sup>. Sleep is known to play a major role in regulating plasticity<sup>4-12</sup>  
55 and accordingly, there has been an interest in modulating sleep for stroke motor rehabilitation<sup>13,14</sup>.  
56 To optimize efforts to modulate sleep effectively, there is a need to better understand neural  
57 processing during sleep, as well as the effect of practical scenarios including patient co-  
58 morbidities and concurrent pharmaceuticals that may impact excitatory/inhibitory neural  
59 transmission. While a whole host of animal and human studies have shown that sleep can  
60 influence motor recovery post-stroke<sup>2,14-23</sup>, more work is needed to understand how sleep  
61 neurophysiology is affected in stroke, as well as inter-individual variations in human stroke  
62 patients. This has become all the more important with advances in our understanding of sleep  
63 neurophysiology linking nested non-rapid eye movement (NREM) oscillations to plasticity, motor  
64 memory consolidation, and motor recovery<sup>4,6,14,24</sup>.

65

66 Sleep-dependent neural processing is crucial for memory consolidation, which is the process of  
67 transferring newly learned information to stable long-term memory<sup>9,25</sup>. Initial investigations looked  
68 at sleep's role in declarative memory<sup>26,27</sup>, but recent studies have underscored sleep's role in  
69 motor skill consolidation<sup>5,6,28</sup>. Specifically, NREM sleep has been linked to reactivation of awake  
70 motor-practice activity and performance gains in a motor skill after sleep<sup>4-6</sup>. Increasingly, now  
71 there is consensus that this consolidation occurs during temporal coupling of sleep spindles (10–  
72 16 Hz) to larger amplitude slow oscillations (SOs, 0.1–1Hz)<sup>6,25,29-31</sup>. Recent work in rodents has  
73 shown that these SOs nested with spindles decline immediately post-stroke and track motor  
74 recovery on a reaching motor task<sup>14</sup>. This work also showed that delta waves ( $\delta$  waves, 1–4Hz),  
75 along with  $\delta$  wave-nested with spindles increased post-stroke, and reduced during recovery.

76 These two nested oscillations (namely SO-nested spindles versus  $\delta$  wave-nested spindles) had  
77 a competing role and pharmacological reduction of tonic  $\gamma$ -aminobutyric acid (GABA)  
78 neurotransmission shifted the balance towards restorative SO-nested spindles in the brain. The  
79 chief goal of our study was to see if NREM oscillations and their nesting were similarly affected  
80 post-stroke in human patients within a hospital setting, one within the framework of real-world  
81 stroke management, including co-morbidities and dissimilar pharmaceuticals that may modulate  
82 neural transmission. We also wanted to check for laterality of NREM oscillations in stroke and  
83 contralateral hemisphere and compare it to healthy subjects.

84  
85 Our study showed that, acutely post-stroke, there is an increase in SOs and  $\delta$  waves on stroke  
86 electrodes when compared to contralateral hemisphere electrodes, whereas healthy subjects had  
87 symmetrical density of these oscillations. We also found that spindles' laterality was disturbed in  
88 stroke subjects with spindles being higher in the stroke hemisphere, except for one patient where  
89 spindles were higher in the contralesional hemisphere. This patient had a subcortical involvement  
90 in stroke. Our linear mixed effect model revealed that there was significant fixed effect of stroke  
91 vs contralateral electrodes for SOs and  $\delta$  waves with overall medium effect sizes including  
92 random effects of concurrent pharmacologic drugs (propofol, dexamethasone, levetiracetam).  
93 We also observed a large effect size of linear mixed model for  $\delta$  wave-nested spindles with  
94 random effects of pharmacologic drugs. Finally, we found that the ratio of SO-nested spindles  
95 laterality index to  $\delta$ -wave-nested spindles laterality index was lower in stroke subjects when  
96 compared to healthy subjects. Together, our work suggests that laterality of NREM sleep  
97 oscillations could be a useful marker for physiological sleep activity post-stroke, and that acute  
98 stroke care management should incorporate pharmacologic drug interactions and their effects on  
99 laterality of 'restorative' sleep oscillations. This may help inform a personalized approach to sleep  
100 modulation for neurorehabilitation.



102

103

## 104 **Patients and Methods**

105

### 106 **Ethics, consent and permissions**

107 This research was conducted in accordance with and approval of the Cedars-Sinai Medical  
108 Center Institutional Review Board (IRB). All research participants and/or their surrogates provided  
109 informed consent to participate in the study.

110

### 111 **Inclusion/exclusion criteria**

112 Retrospective chart review of the Cedars Sinai EEG database was done to identify patients with  
113 acute middle cerebral artery strokes (MCA strokes; with high probability of stroke lesion affecting  
114 sensorimotor regions in the brain) who also received EEG monitoring as part of their hospital stay.  
115 We selected patients who received EEG in the acute period (2-3 days) post-stroke. Other  
116 inclusion criteria were that this should be the first stroke for the patient, they should be within 50-  
117 80 years of age, and the patients should not have any sleep disorders or circadian /diurnal rhythm  
118 disruption. Subjects were excluded if they met the following criteria: currently pregnant or  
119 diagnosed with uncontrolled medical conditions. Five patients were retrospectively identified for  
120 this study, with notable limited availability of EEG studies done within 2-3 days after an MCA  
121 distribution stroke. Of the 5 patients, 3 were female and 2 male, all within the age range of 50-80  
122 years old (see **Table 1** for other details regarding demographic and clinical information).  
123 Indications for EEG were universal for altered mental status after acute stroke. Unlike all other  
124 patients, P4 had subcortical involvement in stroke. It is important to note that spindle oscillations  
125 are postulated to have have a subcortical (thalamocortical) origin<sup>32</sup>. Also of note is that P5 had a  
126 hemorrhagic stroke (ruptured right MCA aneurysmal stroke) and was on norepinephrine due to  
127 shock which improved within 24 hours. P2 had partial status epilepticus involving the right  
128 temporal lobe. We excluded seizure related epochs based on manual inspection of recordings.  
129 This inspection was done by epileptologist (CMR) and seizures were excluded based on no

130 evolving seizure pattern across electrodes (10-20 EEG system). Hence, all of our presented data  
131 was from sleep periods in all the five patients (even in the patient with status epilepticus). An  
132 average of  $\sim 5.9801 \pm 1.2563$  hours (or  $358.8036 \pm 75.4$  mins, mean  $\pm$  s.e.m.) of NREM sleep  
133 was identified and analyzed in each of the five patients. Additionally, we analyzed a dataset of 3  
134 healthy subjects from Cox et. al, Sleep medicine reviews, 2020<sup>33,34</sup> where average NREM sleep  
135 analyzed was  $3.0652 \pm 0.1396$  hours (or  $183.9100 \pm 8.3773$  mins) for 3 subjects. We were not  
136 able to analyze REM/ wake periods in these recordings due to inability to differentiate these  
137 periods due to the lack of EMGs/ video recordings.

138

139

140

#### 141 **EEG analysis and identification of NREM oscillations**

142 Patients with overnight EEG studies 2 to 3 days post-stroke, with appropriate clinic follow up,  
143 were included. The data, obtained by a Natus Xitek EEG and Sleep System, was de-identified  
144 and made compatible for analysis with MATLAB. Each 30-second epoch was individually and  
145 manually marked for NREM sleep by an expert scorer (C.M.R. and B.K.S.). EEG epochs were  
146 analyzed for NREM sleep in a bipolar montage. The following analysis was done with EEG data  
147 in a referential montage, referenced to the auricle electrodes. Spindles, SOs, and  $\delta$  waves were  
148 extracted from these NREM epochs using custom code in MATLAB (details below). This allowed  
149 for the identification of specific sleep waveforms and how they nested temporally and  
150 topographically during NREM sleep. An emphasis was placed on assessing spindles and their  
151 nesting to SOs and  $\delta$  waves. Topographical maps of the average density of these sleep  
152 waveforms allowed us to visualize the average densities with respect to electrode location,  
153 especially their lateral symmetry between hemispheres.

154

155 From the healthy subjects dataset, we used the *common linked mastoids* referenced data<sup>33</sup> and  
156 analyzed NREM sleep. We also identified and only selected 20 electrode channels in similar  
157 locations as stroke patient data for further analysis (because the healthy subject data had more  
158 electrodes than our stroke patient dataset). Similar to stroke EEG data, spindles, SOs, and  $\delta$   
159 waves were extracted from these NREM epochs using custom code in MATLAB and analyzed.

160

#### 161 *EEG Data processing:*

162 For stroke patients, NREM-marked EEG data from all channels was referenced with respect to  
163 the average of the auricular electrodes (A1 & A2, **Fig. 1A**) while the healthy control dataset had  
164 common linked mastoids referenced EEG data. Any high amplitude artifact in the differential EEG  
165 signal was removed. This data was filtered into the frequency ranges of 0.1-4 Hz for  $\delta$ /SOs  
166 identification and 10-16 Hz for spindle detection. We used previously used methods for automatic  
167 detection of these NREM oscillations<sup>6,14,35</sup>. For  ***$\delta$ /SOs detection***, signal was first passed through  
168 a 0.1 Hz high-pass filter and then a 4 Hz low-pass Butterworth filter. All positive-to-negative zero  
169 crossings, previous peaks, following troughs, and negative-to-positive zero crossings were  
170 identified. A wave was considered a  $\delta$  wave if its trough was lower than the negative threshold  
171 and preceded by a peak that was lower than the positive threshold, within 500 ms (**Fig. 1B, E, H**).  
172 SOs were classified as waves with troughs lower than a negative threshold (the bottom 40  
173 percentile of the troughs) and preceding peaks higher than a positive threshold (the top 15  
174 percentile of the peaks; **Fig. 1C, F, I**). Duration between peaks and troughs was between 150  
175 ms and 500 ms. For ***spindle detection***, EEG data was filtered using a 10 Hz high-pass  
176 Butterworth filter and a 16 Hz low-pass Butterworth filter. A smoothed envelope of this signal was  
177 calculated using the magnitude of the Hilbert transforms with convolving by a Gaussian window  
178 (200 ms). Epochs with signal amplitude higher than the upper threshold (mean,  $\mu + 2.5 \cdot \sigma$ )  
179 for at least one sample and amplitude higher than the lower threshold ( $\mu + 1.5 \cdot \sigma$ ) for at least 500  
180 ms were considered spindles (**Fig. 1D, G, J**). The lower threshold was used to define the duration

181 of the spindle. Nested SO-spindles (similar to *k*-complexes studied in humans) were identified as  
182 spindle peaks following SO peaks within 1.5 s duration (**Fig. 1K**). The same criterion was used to  
183 identify  $\delta$  wave-nested spindles (**Fig. 1L**).

184

#### 185 Data Analysis:

186 We generated topographical maps of these different waveforms using *plot\_topography* function  
187 in MATLAB<sup>36</sup> as shown in **Fig. 2**. The patients were separated into 3 different groups based on  
188 concurrent medications, as detailed in **Table 1**. Patient 1 was assigned to Group 1, who was on  
189 continuous propofol and dexamethasone injections every four hours. Group 2, patients 2 and 5,  
190 was administered levetiracetam (Keppra) twice daily; and Group 3, comprised of patients 3 and  
191 4, was not on medications known to significantly modulate excitatory/inhibitory neural  
192 transmission.

193

194 Perilesional electrodes were identified by analyzing post-stroke MRI and CT brain imaging. We  
195 marked 'Stroke electrodes' as the electrodes covering the perilesional region of the brain as  
196 shown in **Fig. 1A**. The mirror opposite electrodes on the contralateral side were marked as  
197 "Contralateral mirror (CM) electrodes' for further analysis (**Fig. 1A**). The non-mirror opposite  
198 electrodes on the contralateral side were marked as "Contralateral non-mirror (CNM) electrodes'.

199

200 We compared the symmetry in NREM oscillations' density across hemispheres for stroke patients  
201 and healthy control using a laterality index (**Fig. 3A-F**). Laterality index of 1 meant the average  
202 density being analyzed for electrode locations selected across hemisphere is exactly same. For  
203 stroke patients, laterality index is defined as the ratio of mean of stroke electrodes' NREM  
204 densities to all contralateral electrodes' NREM densities. For healthy subjects, laterality index is  
205 defined as the ratio of mean of left hemisphere electrodes' NREM densities to right hemisphere

206 electrodes' NREM densities. We also compared the ratio of SO-nested spindles laterality index  
207 to  $\delta$  wave-nested spindles laterality index for stroke vs healthy subjects.

208

## 209 **Statistical Analysis**

210 We performed a linear mixed effect analysis for all patients comparing the *Stroke electrodes*  
211 density vs *Contralateral (CM/CNM) electrodes* density for different waveforms using the  
212 *fitlmematrix* function in MATLAB. The linear mixed effect model was fitted by maximum likelihood  
213 using the formula below (1) for all the different waveforms identified during EEG data processing.  
214 Medication groups were defined as the 3 groups as mentioned earlier. This model considers fixed  
215 effects of stroke vs contralateral (CM/CNM) electrodes, and the random effect of electrodes and  
216 medication groups depending on the patient and can be represented as following equation:

217

218  $Waveform\ Density \sim Intercept + Electrode + (Intercept + Electrode + Medication\ Groups | Patient)$

219

220 The above formula/equation is written in a format similar to documentation for *fitlmematrix* Matlab  
221 function. We compared the *Stroke electrodes* density vs *contralateral (CM/CNM) electrodes*  
222 density within each medication group using a two-tailed *t*-test. Contralateral electrodes chosen  
223 were the exactly mirrored electrodes (**Fig. 3G–L**) or non-mirrored (**Supp. Fig. 2A–F**). One-way  
224 ANOVA was used to compare the stroke electrodes' NREM oscillations' density of the 3 different  
225 medication groups.

226

227 We calculated r-squared ( $R^2$ ) and the Cohen's *d* values for the overall linear mixed effect model  
228 generated. However, the p-values were specifically assessed for fixed effect of electrodes (stroke  
229 vs CM/CNM). Cohen's *d* was used to evaluate if the nested data (all data combined) for NREM  
230 oscillations had a small, medium or large experimental effect (Cohen's *d* = 0.20, 0.50 or 0.80,  
231 respectively)<sup>37</sup>. Effect size indicates if such research findings have practical significance. Metrics

232 such as Cohen's  $d$  are better at the planning stage for pilot studies such as the one here to  
233 determine optimal sample sizes for sufficient power in bigger clinical trials<sup>38</sup>. We have summarized  
234 the linear mixed effects models results in a table in the Supplementary Information.

235

236

237

238

## 239 **Results**

240 One of the limitations of retrospectively analyzing EEG data gathered from clinical EEG was the  
241 heterogeneity encountered across the subjects studied, a contrast from the controlled setting of  
242 related rodent studies. Knowing this, we found that one important similarity across the study  
243 population was the indication for EEG: concern for underlying seizure in the setting of altered  
244 mental status and recent hemispheric stroke. Accordingly, the patients were all hospitalized and  
245 our analysis benefited from close pharmacologic documentation. We observed stark differences  
246 in laterality of NREM oscillations in stroke patients. We observed higher SOs,  $\delta$  waves, spindles  
247 and spindles nested to SOs and  $\delta$  waves in the stroke hemisphere. For the patient with subcortical  
248 involvement in stroke, we observed decrease in spindles in the stroke hemisphere. We also  
249 observed random effects of concurrent medications, particularly medications that influenced  
250 neural transmission. P1 was noted to be on continuous infusion of propofol (<10 mcg total) and  
251 infusions of dexamethasone every 4 hours. P2 and P5 were treated with levetiracetam 500mg  
252 twice daily. P2 was also on acyclovir which was discontinued after cerebrospinal fluid (CSF)  
253 tested negative for meningitis; and P5 was administered nonepinephrine due to being in shock  
254 acutely and improved within 24 hours. P3 and P4 were not given propofol, dexamethasone, or  
255 levetiracetam.

256

### 257 **NREM oscillation densities symmetry is disturbed acutely in stroke**

258 We found that stroke patients had laterality differences (densities were higher or lower in stroke  
259 hemisphere) for all NREM oscillations, while the healthy subject NREM oscillation density looked  
260 more symmetrical across hemispheres (**Fig. 2**). Comparing the laterality index (LI) (as defined in  
261 methods), we found that the LI was closer to 1 on average for healthy subjects and had low  
262 variance but there were differences in stroke patients. SO density LI, stroke:  $1.7761 \pm 0.3387$  and  
263 healthy:  $1.0520 \pm 0.0587$  (**Fig. 3A**). For  $\delta$  wave density LI, stroke:  $1.9251 \pm 0.4368$  and healthy:  
264  $1.0521 \pm 0.0592$  (**Fig. 3B**). For spindle density LI, stroke:  $1.6478 \pm 0.2736$  and healthy:  $1.0498 \pm$

265 0.0669 (**Fig. 3C**). For SO-nested with spindles LI, stroke:  $1.6325 \pm 0.2876$  and healthy:  $1.0884$   
266  $\pm 0.0882$  (**Fig. 3D**). For  $\delta$  wave-nested with spindles LI, stroke:  $1.6299 \pm 0.3387$  and healthy:  
267  $1.0525 \pm 0.0608$  (**Fig. 3E**). The ratio of nested SO-spindles LI and  $\delta$  wave-nested spindle LI,  
268 stroke:  $0.8948 \pm 0.1201$  and healthy:  $1.0280 \pm 0.0344$  (**Fig. 3F**).

269

## 270 **SO and $\delta$ wave density increased in perilesional electrodes**

271 Next, we wanted to closely look at stroke-affected electrodes in stroke patients vis-à-vis the  
272 contralateral hemisphere electrodes in same stroke subjects. In the contralateral hemisphere, we  
273 looked at exactly mirrored electrodes (CM, as defined in the methods; **Fig. 3G**), or non-mirrored  
274 electrodes (CNM, as previously in methods; **Supp. Fig. 2A**). Consistent with previous reports, we  
275 found that stroke electrodes had higher  $< 4$  Hz oscillations (**Fig. 3H,I**; and **Supp. Fig. 2B,C**)<sup>39</sup>.  
276 Our mixed-effects model showed a significant fixed effect of stroke vs CM and CNM electrodes  
277 for a subset of NREM oscillations and overall medium to large effect sizes which included random  
278 effects of concurrent pharmaceuticals. Overall, we observed higher  $\delta$  wave density in the  
279 perilesional electrodes (**Fig. 3H**; **Supp. Fig. 2B**; **Supp. Table 1** and **2** provide statistical details  
280 for stroke versus CM or CNM: p-value is provided for the fixed effect ('electrode'),  $R^2$  and Cohen's  
281  $d$  are for the overall model with fixed and random effects, conventions same henceforth). Our  
282 comparison of laterality index of SOs and  $\delta$  wave showed that LI was higher in stroke patients  
283 compared to healthy subjects: Mean LI SOs, stroke:  $1.7761 \pm 0.3387$  and healthy:  $1.0520 \pm$   
284  $0.0587$ ; Mean LI  $\delta$  wave, stroke:  $1.9251 \pm 0.4368$  and healthy:  $1.0521 \pm 0.0592$ . We also observed  
285 that the stroke patients on propofol and dexamethasone (Group-1) and Group-3 both had higher  
286  $\delta$  wave density on stroke electrodes than the levetiracetam group (**Fig. 3H** and **Supp. Fig. 2B**;  
287 stroke electrodes'  $\delta$  wave density- Group 1:  $11.2315 \pm 2.5270$  counts  $\text{min}^{-1}$  (mean  $\pm$  s.e.m.);  
288 Group 2:  $9.0653 \pm 1.3206$  counts  $\text{min}^{-1}$ ; Group 3:  $12.2454 \pm 1.5866$  counts  $\text{min}^{-1}$ , see **Supp.**  
289 **Table 3** for details). Levetiracetam (Group-2) and Group-3 showed high density of  $\delta$  waves in the  
290 stroke electrodes vs CM/ CNM electrodes (**Fig. 3H** and **Supp. Fig. 2B**). For SOs as well, there



291 was a significant fixed effect of stroke vs contralateral electrodes (**Fig. 3I**; **Supp. Fig. 2C**; **Supp.**  
292 **Table 1** and **2** provide p-values and Cohen's *d*) . When we looked at stroke patients with different  
293 drugs, we observed that the patients in Group-1 did not show a significant difference between  
294 stroke or contralateral electrode SO density; patients in Group-2 showed elevation in SO on stroke  
295 electrodes when compared to CM electrodes (**Fig. 3I**). The patients in Group-3 showed more SOs  
296 on stroke electrodes when compared for CM/CNM electrodes (**Fig. 3I**; **Supp. Fig. 2C**; stroke  
297 electrodes' SO density: Group 1:  $2.9134 \pm 0.7147$  counts  $\text{min}^{-1}$ ; Group 2:  $2.4204 \pm 0.3701$  counts  
298  $\text{min}^{-1}$ ; Group 3:  $3.2858 \pm 0.4464$  counts  $\text{min}^{-1}$ ; see **Supp. Table 3** for details).

299  
300 For spindle oscillations, LI was higher in stroke patients (Mean LI spindles, stroke:  $1.6478 \pm$   
301  $0.2736$  and healthy:  $1.0498 \pm 0.0669$ ). Interestingly, in one patient with subcortical involvement  
302 with stroke (P4), spindles were higher in contralesional hemisphere (**Fig. 3J**). Linear mixed-effects  
303 model did not show a significant fixed effect of spindle density on stroke versus contralateral  
304 electrodes, however, overall it was a medium effect based on the Cohen's *d* (**Fig. 3J** and **Supp.**  
305 **Fig. 2D**; see **Supp. Table 1** and **2** for p-value and Cohen's *d*). Upon looking at different stroke  
306 patients, spindle density was the highest on the stroke electrodes in the patient in Group-1 ( $8.0037$   
307  $\pm 0.8763$  counts  $\text{min}^{-1}$ ), followed by the patients in Group-2 ( $6.8267 \pm 0.7872$  counts  $\text{min}^{-1}$ ), and  
308 then patients in Group-3 ( $5.6120 \pm 0.4366$  counts  $\text{min}^{-1}$ ) (**Fig. 3J** and **Supp Fig. 2D**; see **Supp.**  
309 **Table 3** for details).

310

### 311 **$\delta$ wave-nested spindles and SO-nested spindles**

312 Next we wanted to look at nested oscillations, namely,  $\delta$  wave-nested spindles and SO-nested  
313 spindles oscillations that were shown to have a competing role recently and inverse trend during  
314 stroke recovery<sup>6,14</sup>. LI for both nested oscillations was higher in stroke subjects: Mean LI SO-  
315 nested spindle, stroke:  $1.6325 \pm 0.2876$  and healthy:  $1.0884 \pm 0.0882$ ; Mean LI  $\delta$  wave-nested  
316 spindle, stroke:  $1.6299 \pm 0.3387$  and healthy:  $1.0525 \pm 0.0608$ . While the mixed effects models

317 on  $\delta$  wave-nested spindles and SO-nested spindles did not show a significant difference between  
318 stroke and contralateral electrodes, overall these models still had large and medium effect sizes,  
319 respectively (**Supp. Table 1** and **2**, **Fig. 3K** and **Supp. Fig. 2E**,  $\delta$  wave-nested spindle density on  
320 stroke electrodes: Group-1:  $3.4911 \pm 0.3032$  counts  $\text{min}^{-1}$ ; Group-2:  $3.2476 \pm 0.4770$  counts  $\text{min}^{-1}$ ;  
321 Group-3:  $2.7031 \pm 0.2032$  counts  $\text{min}^{-1}$ , also see **Supp. Table 3**; SO-nested spindle density  
322 on stroke electrodes: Group 1:  $0.9150 \pm 0.1111$  counts  $\text{min}^{-1}$ ; Group 2:  $0.8583 \pm 0.1751$  counts  
323  $\text{min}^{-1}$ ; Group 3:  $0.6828 \pm 0.0576$  counts  $\text{min}^{-1}$ ; see **Fig. 3L**; **Supp. Fig. 2F**; and **Supp. Table 3**).  
324 Notably, the ratio of SO-nested spindle LI to  $\delta$  wave-nested spindle LI was lower in stroke subjects  
325 compared to healthy subjects (Mean LI ratio, stroke:  $0.8948 \pm 0.1201$  and healthy:  $1.0280 \pm$   
326  $0.0344$ ), which indicates relatively increased  $\delta$  wave-nested spindles when compared to SO-  
327 nested spindles (the oscillations that have a competing role in forgetting vs strengthening,  
328 respectively) in the perilesional areas for stroke brain compared to healthy brain.

329  
330 Together, these results show that lateral symmetry of NREM oscillations is disturbed in stroke  
331 (**Fig. 3A-F**), when compared to healthy subjects. These results also indicate that there is an  
332 elevation of SO,  $\delta$  wave, spindles, and spindle nesting to SOs or  $\delta$  waves in the perilesional areas  
333 post-stroke.

334

## 335 **Discussion**

336 Our results show that, post-stroke there is a disturbance in laterality of NREM sleep oscillations  
337 between ipsilesional and contralesional hemisphere. Interestingly, hemispherical differences in  
338 these nested oscillations were less pronounced in healthy subjects, and oscillations appeared  
339 mostly symmetric. We used a laterality index for comparing NREM oscillations, especially nested  
340 oscillations, *i.e.*, SO-nested spindle oscillations and  $\delta$  wave-nested spindle oscillations. These  
341 two nested oscillations were recently demonstrated to have a competing role during stroke  
342 recovery in preclinical setting. Our results here might help improve neuromodulation of sleep for  
343 rehabilitation that targets improvement in laterality index of NREM sleep oscillations. While our  
344 findings are preliminary in a small pilot dataset, these findings report an interesting effect size,  
345 suggesting a roadmap for delineating pathological sleep in larger cohorts and optimal therapeutic  
346 modulation to promote recovery.

347

### 348 ***Sleep and plasticity post-stroke***

349 Preclinical and clinical studies that have evaluated local-field potentials (LFPs) in animals<sup>40,41</sup> and  
350 EEG in human patients<sup>22,42,43</sup> have found increased low-frequency power during awake,  
351 spontaneous periods after a stroke. These studies postulate that this increased low-frequency  
352 activity could be a marker of cortical injury and loss of subcortical inputs<sup>44</sup>. Our findings on  
353 increased SOs and  $\delta$  waves on stroke electrodes are indicative of similar phenomena. We also  
354 found an increase in SO-nested spindles and  $\delta$  wave-nested spindles on stroke electrodes along  
355 with a lower ratio of SO-nested spindle LI/  $\delta$  wave-nested spindle LI (**Fig. 3F**). There is growing  
356 evidence that temporal coupling of spindles to SOs is a primary driver of sleep-related plasticity  
357 and memory consolidation<sup>6,30,31,45–48</sup>. SO-nested spindles are linked to spike-time dependent  
358 plasticity<sup>49</sup>. These events are also related to reactivation of awake experiences<sup>30,47,50</sup>. Importantly,  
359 disruption of this coupling can impair sleep-related memory consolidation of awake experiences<sup>6</sup>.  
360 This same work showed that SO-nested spindles and  $\delta$  wave-nested spindles compete with each

361 other to either strengthen or forget a memory. Our results indicate that balance of SO-nested  
362 spindle density and  $\delta$  wave-nested spindle density is disturbed hemispherically in stroke patients  
363 compared to healthy subjects. These might be related to impaired sleep-processing that may  
364 impact recovery. Interestingly, we observed large- to medium effect sizes in our mixed-effects  
365 models for  $\delta$  wave-nested spindle and SO-nested spindle where we considered fixed effects of  
366 electrodes and random effects of drugs and patients. It is worth noting that drugs like propofol can  
367 impact such nested sleep oscillations<sup>51,52</sup>. It may be important to consider effects of drugs on  
368 sleep oscillations when modulating sleep for stroke recovery.

369

### 370 ***Propofol and Levetiracetam: effect on sleep***

371 We made some observations on different medications that stroke patients received during sleep  
372 EEG recordings. Group-1 patient received propofol, which is one of the most commonly used  
373 anesthetics in neurologic intensive care units after stroke or traumatic brain injury<sup>53</sup>. It exerts its  
374 action by potentiating the activity of chloride currents through GABA receptors while blocking  
375 voltage-gated sodium channels<sup>54-56</sup>. The patient on propofol received less than 10 mcg dose of  
376 propofol at which does it is not known to impact sleep<sup>57,58</sup>. Group-2 patients received levetiracetam  
377 (keppra), which is a relatively newer anti-seizure drug. The exact mechanism for its anti-seizure  
378 mechanism is unclear, but it is believed to exert its effect through synaptic vesicle glycoprotein  
379 2A<sup>59</sup>. Through this mechanism, levetiracetam is capable of modulating neurotransmission by  
380 inhibiting calcium currents<sup>60</sup>. A study has shown that levetiracetam has minimal effect on sleep  
381 parameters like total sleep duration, sleep latency, and sleep efficiency in both healthy humans  
382 and partial epilepsy patients<sup>61</sup>. However, observations have been made that levetiracetam can  
383 reduce motor activity and cause daytime drowsiness in patients<sup>61,62</sup>. Propofol, by its GABAergic  
384 action, causes greater loss of faster frequencies during induction with a shift in alpha frequencies  
385 to the frontal regions that reverses post-awakening<sup>63-65</sup>. Since our mixed-effects model found  
386 large to medium effects when considering random effects of drugs on all NREM oscillation, it may

387 be useful to explore effects of drugs on NREM sleep densities with larger patient cohorts in the  
388 future. Since our data shows disturbed laterality of NREM oscillations, different drugs that stroke  
389 patients are on might need to be factored in, when restoring physiological sleep oscillations post-  
390 stroke.

391

### 392 ***Sleep processing and stroke rehabilitation***

393 Recent rodent work profiled SO-nested and  $\delta$  wave-nested spindles during the course of stroke  
394 recovery and found links between these nested structures and motor performance gains during  
395 recovery<sup>6</sup>. This work specifically looked into gains on reach-training, but clinical rehabilitation  
396 approaches can be varied<sup>66-68</sup>. It is likely that the sleep features of nested oscillations and their  
397 putative pathological or physiological roles need to be factored in when considering timing for  
398 rehabilitation, irrespective of training type. Previous human and rodent studies have also  
399 suggested critical periods in training can offer long-term benefits<sup>69-71</sup>. Past studies that have found  
400 awake low-frequency power in stroke patients might be related to our findings of increased SO  
401 and  $\delta$  waves densities. Future studies where EEG data is captured over the long term may  
402 delineate a transition of  $\delta$  wave LI, SOs LI,  $\delta$  wave-nested spindles LI (pathological sleep) and  
403 SO-nested spindle LI (physiological sleep), and its relation to critical periods post-stroke for  
404 optimal timing of rehabilitation. For example, SO-nested spindles LI and  $\delta$  wave-nested spindles  
405 LI proportions between hemispheres could be targeted to be brought closer to unity as in healthy  
406 subjects, to accelerate recovery.

407

### 408 ***Modulation of sleep as a therapeutic intervention***

409 The results we have presented can form the basis of translational studies in the future that target  
410 modulation of sleep post-stroke. Animal studies have suggested that modulation of GABAergic  
411 transmission (specifically GABA<sub>A</sub>-receptor mediated tonic inhibition) in the perilesional cortex can  
412 serve as a therapeutic target to promote recovery, and that blocking of GABA<sub>A</sub>-mediated tonic

413 inhibition promoted motor recover maximally in the first 1 to 2 weeks post-stroke<sup>72,73</sup>. Both short-  
414 term (acute) and long-term chronic infusion of GABA<sub>A</sub> inhibiting compounds have been tested,  
415 and long-term infusion was shown to be better<sup>72</sup>. Long-term pharmacologic modulation as shown  
416 by Clarkson and colleagues may be essential to achieve observable motor benefits in human  
417 patients. Benefits of long-term infusion include effect of the drug not only with rehabilitation-  
418 specific online (awake) training, but also during offline memory consolidation during sleep.

419  
420 Studies such as ours can also help guide electric stimulation-based neuromodulation for  
421 augmenting recovery. SOs and  $\delta$  waves can be easily monitored using EEG in stroke patients.  
422 Non-invasive brain stimulation during sleep<sup>30,47,74,75</sup> can be used to modulate specific NREM  
423 oscillations. Invasive stimulation approaches such as epidural stimulation<sup>76</sup> can also focus on  
424 sleep state to optimize sleep neural processing. Similar approaches have shown that direct  
425 epidural motor cortical electric stimulation can enhance awake performance and neural  
426 activity<sup>77,78</sup> and epidural stimulation of subcortical regions can also modulate low-frequency  
427 oscillations in the motor cortex<sup>79</sup>, however such approaches have not been applied during sleep.  
428 A recent study suggested modulating UP states during sleep can enhance recovery<sup>18</sup>. It is  
429 plausible that future approaches targeting sleep, when delivered in a closed-loop fashion,  
430 optimize both awake task performance and its consequent sleep processing, and may lead to  
431 greater long-term benefits during rehabilitation. Indices such as laterality index that we pursued  
432 here may serve a utilitarian purpose in long-term sleep evaluation post-stroke with different  
433 treatments. Our pilot observations here also suggest that concurrent pharmacologic drugs may  
434 affect NREM oscillations and hence they should also be considered when personalizing sleep  
435 stimulation.

436

437 **Limitations**

438 One of the limitations of our study is the lack of a link between sleep architecture and motor status.  
439 Future work that studies sleep over several days post-stroke and assesses motor functionality  
440 longitudinally may find more robust links between sleep processing and related gains in motor  
441 performance. It is also possible that, with more effective task performance and associated awake  
442 neural dynamics<sup>77,78,80</sup>, efficacy of sleep may change. Precise disruption of sleep processing,  
443 specifically SO-spindle coupling in healthy animals, was sufficient to prevent offline performance  
444 gains, even when awake task learning was robust<sup>6</sup>. This work also showed that precise  
445 modulation of the extent of sleep spindle-SO coupling in healthy animals could either enhance or  
446 impede sleep processing. While extension of this work in stroke animals has shown SO-spindle  
447 nesting resurges with recovery<sup>14</sup>, future animal studies that modulate sleep microarchitecture can  
448 study if artificial manipulation of SO-nested spindles or  $\delta$  wave-nested spindles after stroke are  
449 sufficient to enhance or impair motor recovery. Our work here showed that both SO-nested  
450 spindles and  $\delta$  wave-nested spindles increased in stroke affected hemisphere acutely post-stroke.  
451 Future work that monitors these oscillations for longer periods will be needed to assess if SO-  
452 nested spindles should increase relatively to  $\delta$  wave-nested spindles for better recovery in human  
453 stroke patients.

454  
455 One more limitation of this study is the limited sample size with varying lesion location and size.  
456 But ours is a pilot study. While we focused on getting patients with cortical lesions, sleep may  
457 have been impacted differently for one patient with a primarily subcortical stroke. For example, a  
458 stroke in the white matter that impacts thalamocortical networks may impact spindles (as we saw  
459 in our P4, with higher spindles in contralesional hemisphere), believed to have a thalamocortical  
460 origin. Future work with larger sample sizes and incorporation of motor task rehabilitation training  
461 and drug manipulation, may provide stronger links to engineer sleep to benefit motor recovery  
462 post-stroke.

463

464 **Author Contributions**

465 B.K.S., R.R., C.M.R. and T.G. contributed to the design of the study. R.R., B.K.S. and A.A.  
466 contributed to the analysis of the data. B.K.S., J.M.C. and C.M.R., contributed to the acquisition  
467 of data. B.K.S., R.R., C.M.R. and T.G. contributed to the interpretation of the data. B.K.S., R.R.,  
468 C.M.R. and T.G. contributed to the draft of the article.

469

470 **Acknowledgment**

471 We would like to thank the patients that participated in this study. We would like to thank the  
472 Cedars-Sinai Neurophysiology team that helped in EEG data acquisition and consent especially  
473 Cody Holland, Erica Quan and Ho Duong. We thank Karunesh Ganguly and Jaekyung Kim for  
474 NREM sleep oscillations detection Matlab code. The study was supported by American Heart  
475 Association (AHA; predoctoral fellowship 23PRE1018175 to R.R., postdoctoral fellowship 897265  
476 to A.A. and career development award 847486 to T.G.), National Institutes of Health (NIH)'s  
477 National Institute for Neurological Disorders and Stroke (NINDS) (R00NS097620 and  
478 R01NS128469 to T.G.), National Science Foundation (award 2048231 to T.G.) and Cedars-Sinai  
479 Medical Center. A.A. also received support through Cedars-Sinai's Center for Neural Science and  
480 Medicine postdoctoral fellowship.

481

482 **Conflict of Interest**

483 The authors report no conflicts of interest relevant to this study.

484

485 **Data Availability Statement**

486 The data that support the findings of this study are available from the corresponding author upon  
487 reasonable request.

488



489 **References**

490

- 491 1. Ganguly K, Poo MM. Activity-dependent neural plasticity from bench to bedside. *Neuron*  
492 2013;80(3):729–41.
- 493 2. Ganguly K, Khanna P, Morecraft RJ, Lin DJ. Modulation of neural co-firing to enhance  
494 network transmission and improve motor function after stroke. *Neuron* 2022;110(15):2363–  
495 2385.
- 496 3. Norrving B, Kissela B. The global burden of stroke and need for a continuum of care.  
497 *Neurology* 2013;80:S5-12.
- 498 4. Gulati T, Guo L, Ramanathan DS, et al. Neural reactivations during sleep determine  
499 network credit assignment. *Nature Neuroscience* 2017;20:1277–1284.
- 500 5. Ramanathan DS, Gulati T, Ganguly K. Sleep-Dependent Reactivation of Ensembles in  
501 Motor Cortex Promotes Skill Consolidation. *PLoS Biol* 2015;13:e1002263.
- 502 6. Kim J, Gulati T, Ganguly K. Competing Roles of Slow Oscillations and Delta Waves in  
503 Memory Consolidation versus Forgetting. *Cell* 2019;179(2):514-526 e13.
- 504 7. Gulati T, Ramanathan DS, Wong CC, Ganguly K. Reactivation of emergent task-related  
505 ensembles during slow-wave sleep after neuroprosthetic learning. *Nat Neurosci*  
506 2014;17(8):1107–13.
- 507 8. Genzel L, Kroes MC, Dresler M, Battaglia FP. Light sleep versus slow wave sleep in  
508 memory consolidation: a question of global versus local processes? *Trends Neurosci*  
509 2014;37:10–19.
- 510 9. Stickgold R. Sleep-dependent memory consolidation. *Nature* 2005;437:1272–1278.
- 511 10. Tononi G, Cirelli C. Sleep and the price of plasticity: from synaptic and cellular  
512 homeostasis to memory consolidation and integration. *Neuron* 2014;81:12–34.
- 513 11. de Vivo L, Bellesi M, Marshall W, et al. Ultrastructural evidence for synaptic scaling across  
514 the wake/sleep cycle. *Science* 2017;355:507–510.
- 515 12. Klinzing JG, Niethard N, Born J. Mechanisms of systems memory consolidation during  
516 sleep. *Nat Neurosci* 2019;22(10):1598–1610.
- 517 13. Ebajemito JK, Furlan L, Nissen C, Sterr A. Application of Transcranial Direct Current  
518 Stimulation in Neurorehabilitation: The Modulatory Effect of Sleep. *Frontiers in neurology*  
519 2016;7:54.
- 520 14. Kim J, Guo L, Hishinuma A, et al. Recovery of consolidation after sleep following stroke—  
521 interaction of slow waves, spindles, and GABA. *Cell Reports* 2022;38(9):110426.

- 522 15. Backhaus W, Braass H, Gerloff C, Hummel FC. Can Daytime Napping Assist the Process  
523 of Skills Acquisition After Stroke? *Front Neurol* 2018;9:1002.
- 524 16. Baumann CR, Kilic E, Petit B, et al. Sleep EEG Changes After Middle Cerebral Artery  
525 Infarcts in Mice: Different Effects of Striatal and Cortical Lesions. *Sleep*  
526 2006;29(10):1339–1344.
- 527 17. Duss SB, Seiler A, Schmidt MH, et al. The role of sleep in recovery following ischemic  
528 stroke: A review of human and animal data. *Neurobiology of Sleep and Circadian Rhythms*  
529 2017;2:94–105.
- 530 18. Facchin L, Schöne C, Mensen A, et al. Slow Waves Promote Sleep-Dependent Plasticity  
531 and Functional Recovery after Stroke. *J. Neurosci.* 2020;40(45):8637–8651.
- 532 19. Gao B, Cam E, Jaeger H, et al. Sleep Disruption Aggravates Focal Cerebral Ischemia in the  
533 Rat. *Sleep* 2010;33(7):879–887.
- 534 20. Giubilei F, Iannilli M, Vitale A, et al. Sleep patterns in acute ischemic stroke. *Acta*  
535 *Neurologica Scandinavica* 1992;86(6):567–571.
- 536 21. Gottselig JM, Bassetti CL, Achermann P. Power and coherence of sleep spindle frequency  
537 activity following hemispheric stroke. *Brain* 2002;125(2):373–383.
- 538 22. Poryazova R, Huber R, Khatami R, et al. Topographic sleep EEG changes in the acute and  
539 chronic stage of hemispheric stroke. *Journal of Sleep Research* 2015;24(1):54–65.
- 540 23. Siengsukon CF, Boyd LA. Sleep to learn after stroke: Implicit and explicit off-line motor  
541 learning. *Neuroscience Letters* 2009;451(1):1–5.
- 542 24. Lemke SM, Ramanathan DS, Darevksy D, et al. Coupling between motor cortex and  
543 striatum increases during sleep over long-term skill learning. *eLife* 2021;10:e64303.
- 544 25. Born J, Rasch B, Gais S. Sleep to Remember. *Neuroscientist* 2006;12(5):410–424.
- 545 26. Rothschild G, Eban E, Frank LM. A cortical–hippocampal–cortical loop of information  
546 processing during memory consolidation. *Nat Neurosci* 2017;20(2):251–259.
- 547 27. Sirota A, Csicsvari J, Buhl D, Buzsáki G. Communication between neocortex and  
548 hippocampus during sleep in rodents. *Proceedings of the National Academy of Sciences*  
549 2003;100(4):2065–2069.
- 550 28. Walker MP, Brakefield T, Morgan A, et al. Practice with sleep makes perfect: sleep-  
551 dependent motor skill learning. *Neuron* 2002;35:205–211.
- 552 29. Buzsáki G. Hippocampal sharp wave-ripple: A cognitive biomarker for episodic memory  
553 and planning. *Hippocampus* 2015;25(10):1073–1188.

- 554 30. Cairney SA, Guttesen A á V, El Marj N, Staresina BP. Memory Consolidation Is Linked to  
555 Spindle-Mediated Information Processing during Sleep. *Current Biology* 2018;28(6):948-  
556 954.e4.
- 557 31. Latchoumane C-FV, Ngo H-VV, Born J, Shin H-S. Thalamic Spindles Promote Memory  
558 Formation during Sleep through Triple Phase-Locking of Cortical, Thalamic, and  
559 Hippocampal Rhythms. *Neuron* 2017;95(2):424-435.e6.
- 560 32. Fernandez LMJ, Lüthi A. Sleep Spindles: Mechanisms and Functions. *Physiological*  
561 *Reviews* 2020;100(2):805–868.
- 562 33. Cox R, Fell J. Analyzing human sleep EEG: A methodological primer with code  
563 implementation. *Sleep Medicine Reviews* 2020;54:101353.
- 564 34. Cox R. analyzing human sleep EEG [Internet]. 2020;[cited 2023 Sep 1 ] Available from:  
565 <https://zenodo.org/record/3929730>
- 566 35. Silversmith DB, Lemke SM, Egert D, et al. The Degree of Nesting between Spindles and  
567 Slow Oscillations Modulates Neural Synchrony. *J Neurosci* 2020;40(24):4673–4684.
- 568 36. Martínez-Cagigal V. Topographic EEG/MEG plot [Internet]. 2023;Available from:  
569 <https://www.mathworks.com/matlabcentral/fileexchange/72729-topographic-eeg-meg-plot>
- 570 37. Aarts E, Verhage M, Veenvliet JV, et al. A solution to dependency: using multilevel  
571 analysis to accommodate nested data. *Nat Neurosci* 2014;17(4):491–6.
- 572 38. Sullivan GM, Feinn R. Using Effect Size—or Why the P Value Is Not Enough. *J Grad Med*  
573 *Educ* 2012;4(3):279–282.
- 574 39. Cassidy JM, Wodeyar A, Wu J, et al. Low-Frequency Oscillations Are a Biomarker of  
575 Injury and Recovery After Stroke. *Stroke* 2020;51(5):1442–1450.
- 576 40. Carmichael ST, Chesselet MF. Synchronous neuronal activity is a signal for axonal  
577 sprouting after cortical lesions in the adult. *J Neurosci* 2002;22:6062–6070.
- 578 41. Gulati T, Won SJ, Ramanathan DS, et al. Robust neuroprosthetic control from the stroke  
579 perilesional cortex. *The Journal of Neuroscience* 2015;35:8653–61.
- 580 42. Tu-Chan AP, Natraj N, Godlove J, et al. Effects of somatosensory electrical stimulation on  
581 motor function and cortical oscillations. *J NeuroEngineering Rehabil* 2017;14(1):113.
- 582 43. van Dellen E, Hillebrand A, Douw L, et al. Local polymorphic delta activity in cortical  
583 lesions causes global decreases in functional connectivity. *NeuroImage* 2013;83:524–532.
- 584 44. Topolnik L, Steriade M, Timofeev I. Partial Cortical Deafferentation Promotes  
585 Development of Paroxysmal Activity. *Cerebral Cortex* 2003;13(8):883–893.

- 586 45. Helfrich RF, Mander BA, Jagust WJ, et al. Old Brains Come Uncoupled in Sleep: Slow  
587 Wave-Spindle Synchrony, Brain Atrophy, and Forgetting. *Neuron* 2018;97(1):221-230.e4.
- 588 46. Maingret N, Girardeau G, Todorova R, et al. Hippocampo-cortical coupling mediates  
589 memory consolidation during sleep. *Nat Neurosci* 2016;19(7):959–964.
- 590 47. Antony JW, Piloto L, Wang M, et al. Sleep Spindle Refractoriness Segregates Periods of  
591 Memory Reactivation. *Current Biology* 2018;28(11):1736-1743.e4.
- 592 48. Staresina BP, Bergmann TO, Bonnefond M, et al. Hierarchical nesting of slow oscillations,  
593 spindles and ripples in the human hippocampus during sleep. *Nat Neurosci*  
594 2015;18(11):1679–1686.
- 595 49. Bergmann TO, Born J. Phase-Amplitude Coupling: A General Mechanism for Memory  
596 Processing and Synaptic Plasticity? *Neuron* 2018;97(1):10–13.
- 597 50. Peyrache A, Khamassi M, Benchenane K, et al. Replay of rule-learning related neural  
598 patterns in the prefrontal cortex during sleep. *Nat Neurosci* 2009;12:919–926.
- 599 51. Bhattacharya S, Donoghue JA, Mahnke M, et al. Propofol Anesthesia Alters Cortical  
600 Traveling Waves. *Journal of Cognitive Neuroscience* 2022;34(7):1274–1286.
- 601 52. Soplata AE, Adam E, Brown EN, et al. Rapid thalamocortical network switching mediated  
602 by cortical synchronization underlies propofol-induced EEG signatures: a biophysical  
603 model [Internet]. 2023;2022.02.17.480766.[cited 2023 Apr 10 ] Available from:  
604 <https://www.biorxiv.org/content/10.1101/2022.02.17.480766v2>
- 605 53. Bauerschmidt A, Al-Bermani T, Ali S, et al. Modern Sedation and Analgesia Strategies in  
606 Neurocritical Care. *Curr Neurol Neurosci Rep* 2023;
- 607 54. Kang Y, Saito M, Toyoda H. Molecular and Regulatory Mechanisms of Desensitization and  
608 Resensitization of GABAA Receptors with a Special Reference to Propofol/Barbiturate. *Int*  
609 *J Mol Sci* 2020;21(2):563.
- 610 55. Ouyang W, Wang G, Hemmings HC. Isoflurane and propofol inhibit voltage-gated sodium  
611 channels in isolated rat neurohypophysial nerve terminals. *Mol Pharmacol* 2003;64(2):373–  
612 381.
- 613 56. Tang P, Eckenhoff R. Recent progress on the molecular pharmacology of propofol.  
614 *F1000Res* 2018;7:123.
- 615 57. Kondili E, Alexopoulou C, Xirouchaki N, Georgopoulos D. Effects of propofol on sleep  
616 quality in mechanically ventilated critically ill patients: a physiological study. *Intensive*  
617 *Care Med* 2012;38(10):1640–1646.
- 618 58. Yue X-F, Wang A-Z, Hou Y-P, Fan K. Effects of propofol on sleep architecture and sleep–  
619 wake systems in rats. *Behavioural Brain Research* 2021;411:113380.

- 620 59. Lynch BA, Lambeng N, Nocka K, et al. The synaptic vesicle protein SV2A is the binding  
621 site for the antiepileptic drug levetiracetam. *Proc Natl Acad Sci U S A* 2004;101(26):9861–  
622 9866.
- 623 60. Luz Adriana PM, Blanca Alcira RM, Itzel Jatziri CG, et al. Effect of levetiracetam on  
624 extracellular amino acid levels in the dorsal hippocampus of rats with temporal lobe  
625 epilepsy. *Epilepsy Research* 2018;140:111–119.
- 626 61. Bell C, Vanderlinden H, Hiersemenzel R, et al. The effects of levetiracetam on objective  
627 and subjective sleep parameters in healthy volunteers and patients with partial epilepsy.  
628 *Journal of Sleep Research* 2002;11(3):255–263.
- 629 62. Bazil CW, Battista J, Basner RC. Effects of levetiracetam on sleep in normal volunteers.  
630 *Epilepsy & Behavior* 2005;7(3):539–542.
- 631 63. Murphy M, Bruno M-A, Riedner BA, et al. Propofol Anesthesia and Sleep: A High-Density  
632 EEG Study. *Sleep* 2011;34(3):283–291.
- 633 64. Yeh W-C, Lu S-R, Wu M-N, et al. The impact of antiseizure medications on  
634 polysomnographic parameters: a systematic review and meta-analysis. *Sleep Medicine*  
635 2021;81:319–326.
- 636 65. Purdon PL, Pierce ET, Mukamel EA, et al. Electroencephalogram signatures of loss and  
637 recovery of consciousness from propofol. *Proc Natl Acad Sci U S A* 2013;110(12):E1142-  
638 1151.
- 639 66. Bernhardt J, Hayward KS, Kwakkel G, et al. Agreed Definitions and a Shared Vision for  
640 New Standards in Stroke Recovery Research: The Stroke Recovery and Rehabilitation  
641 Roundtable Taskforce. *Neurorehabil Neural Repair* 2017;31(9):793–799.
- 642 67. Pearson-Fuhrhop KM, Kleim JA, Cramer SC. Brain Plasticity and Genetic Factors. *Topics*  
643 *in Stroke Rehabilitation* 2009;16(4):282–299.
- 644 68. Ganguly K, Byl NN, Abrams GM. Neurorehabilitation: Motor recovery after stroke as an  
645 example. *Annals of Neurology* 2013;74(3):373–381.
- 646 69. Dromerick AW, Lang CE, Birkenmeier RL, et al. Very Early Constraint-Induced  
647 Movement during Stroke Rehabilitation (VECTORS): A single-center RCT. *Neurology*  
648 2009;73(3):195–201.
- 649 70. Dromerick AW, Geed S, Barth J, et al. Critical Period After Stroke Study (CPASS): A  
650 phase II clinical trial testing an optimal time for motor recovery after stroke in humans.  
651 *Proceedings of the National Academy of Sciences* 2021;118(39):e2026676118.
- 652 71. Krakauer JW, Carmichael ST, Corbett D, Wittenberg GF. Getting Neurorehabilitation  
653 Right: What Can Be Learned From Animal Models? *Neurorehabil Neural Repair*  
654 2012;26(8):923–931.

- 655 72. Clarkson AN, Huang BS, MacIsaac SE, et al. Reducing excessive GABA-mediated tonic  
656 inhibition promotes functional recovery after stroke. *Nature* 2010;468(7321):305–309.
- 657 73. He W-M, Ying-Fu L, Wang H, Peng Y-P. Delayed treatment of  $\alpha 5$  GABAA receptor  
658 inverse agonist improves functional recovery by enhancing neurogenesis after cerebral  
659 ischemia-reperfusion injury in rat MCAO model. *Sci Rep* 2019;9(1):2287.
- 660 74. Marshall L, Helgadottir H, Molle M, Born J. Boosting slow oscillations during sleep  
661 potentiates memory. *Nature* 2006;444:610–613.
- 662 75. Ngo H-VV, Martinetz T, Born J, Mölle M. Auditory Closed-Loop Stimulation of the Sleep  
663 Slow Oscillation Enhances Memory. *Neuron* 2013;78(3):545–553.
- 664 76. Levy RM, Harvey RL, Kissela BM, et al. Epidural Electrical Stimulation for Stroke  
665 Rehabilitation: Results of the Prospective, Multicenter, Randomized, Single-Blinded  
666 Everest Trial. *Neurorehabil Neural Repair* 2016;30(2):107–119.
- 667 77. Khanna P, Totten D, Novik L, et al. Low-frequency stimulation enhances ensemble co-  
668 firing and dexterity after stroke [Internet]. *Cell* 2021; Available from:  
669 <https://www.ncbi.nlm.nih.gov/pubmed/33571430>
- 670 78. Ramanathan DS, Guo L, Gulati T, et al. Low-frequency cortical activity is a  
671 neuromodulatory target that tracks recovery after stroke. *Nat Med* 2018;24(8):1257–1267.
- 672 79. Abbasi A, Danielsen NP, Leung J, et al. Epidural cerebellar stimulation drives widespread  
673 neural synchrony in the intact and stroke perilesional cortex. *Journal of NeuroEngineering*  
674 *and Rehabilitation* 2021;18(1):89.
- 675 80. Guo L, Kondapavulur S, Lemke SM, et al. Coordinated increase of reliable cortical and  
676 striatal ensemble activations during recovery after stroke. *Cell Reports* 2021;36(2):109370.

677

678

679

680

681

682

683

684

685



## 686 List of Figures

687 **Figure 1. Stroke versus contralateral mirror/non-mirror electrode assignment and NREM**  
688 **sleep oscillations. A**, 10–20 system for EEG (used in stroke patients) showing locations of all  
689 electrode locations recorded with an illustration of stroke. Grey shaded area shows a  
690 representative stroke perilesional region. Blue shaded circles represent auricular electrodes (A1,  
691 A2) that were used for referencing in the stroke patients. Red circles indicate identified *stroke*  
692 *electrodes* based on proximity to the perilesional area. Green circles indicate identified  
693 *contralateral mirror (CM) electrodes* which are contralateral and mirrored to identified *stroke*  
694 *electrodes*. Yellow circles indicate identified *contralateral non-mirror (CNM) electrodes* which are  
695 electrodes other than *contralateral mirror (CM) electrodes* in non-stroke hemisphere. **B**, Mean  $\delta$ -  
696 wave along with s.e.m. (standard error of mean) bands (blue) for all identified  $\delta$ -waves from an  
697 example *stroke electrode* channel from EEG data recording for one stroke patient. **C**, Same as **B**  
698 for SO waveforms. **D**, Same as **B** for spindle waveforms. **E, F, G**, Same as **B, C, D** for one  
699 example *contralateral mirror* electrode channel for a stroke patient. **H, I, J** Same as **B, C, D** for  
700 one example channel for a healthy subject. All waveforms are centered around the detected  
701 states. **K**, Illustration of SO-spindle nesting. Nesting window was  $-0.5$  to  $+1.0$  s from SO's UP  
702 state as shown. **L**, Illustration of  $\delta$ -wave-spindle nesting. Nesting window was  $-0.5$  to  $+1.0$  s from  
703  $\delta$  UP state as depicted.

704 **Figure 2. Imaging data and topographical density plots for different NREM oscillations.** Top  
705 to bottom: **Imaging data**: CT (computed tomography) image for patient P1, T2 sequences of MRI  
706 (magnetic resonance imaging) images for patients P2 to P5; no imaging data available for healthy  
707 subjects (P6 to P8). Radiologic imaging has been flipped horizontally to align with topographic  
708 density maps; *i.e.*, image left, and right are ipsilateral to patient left and right. Left and right are  
709 marked in imaging figures (P1-P5) and apply to density topographical maps below them;  
710 **Topographical maps** for detected *spindle* density (count/min) during NREM sleep for all  
711 subjects; **Topographical maps** for detected *SO* density (count/min) during NREM sleep for all  
712 subjects; **Topographical maps** for detected  *$\delta$  waves'* density (count/min) during NREM sleep  
713 for all subjects; **Topographical maps** for detected *nested SO-spindle* density (count/min) during  
714 NREM sleep for all subjects; **Topographical maps** for detected  *$\delta$  wave-nested-spindle* density  
715 (count/min) during NREM sleep for all subjects. Color map shown at right for all the panels in a  
716 row.

717 **Figure 3. NREM oscillations' laterality in stroke patient's vs healthy controls; and NREM**  
718 **oscillations' densities for different patient groups on stroke versus contralateral mirror**  
719 **(CM) electrodes.** For stroke patients' laterality index (LI) is defined as ratio of mean of stroke  
720 electrode NREM densities to all contralateral electrode NREM densities. For healthy subjects'  
721 laterality index is defined as ratio of mean of left hemisphere electrode NREM densities to right  
722 hemisphere electrode NREM densities. **A**, LI for SO density for stroke patients and healthy  
723 controls. Black line connects the mean of stroke and control group. Dots represent different  
724 patients/subjects; **blue dots**: Patients in propofol medication group; **orange dots**: Patients in  
725 levetiracetam medication group; **green dots**: Stroke patients in other medication group; **yellow**  
726 **dots**: Healthy subjects. **B**, Same as **A** for  $\delta$  wave density LI. **C**, Same as **A** for spindle density LI.  
727 **D**, Same as **A** for nested SO-spindle density LI. **E**, Same as **A** for Nested  $\delta$  wave-spindle  
728 density LI. **F**, Ratio of LI for nested SO-spindle density and nested  $\delta$  wave-spindle density. **G**, Table  
729 showing selected *stroke* and *contralateral mirror electrodes (CM)* for all patients. **H**, Comparison  
730 of  $\delta$  wave density (count/min) on *stroke versus CM electrodes* for patients on different  
731 medications. Thick black line shows the mean values within the group. Thinner black lines join

732 pair of stroke and CM electrode. Dots represent the NREM oscillations' density for single  
733 electrode. **I**, Same as **H** for SO density. **J**, Same as **H** for spindle density. **K**, Same as **H** for nested  
734  $\delta$  wave-nested spindle density. **L**, Same as **H** for SO-nested spindle density. \*: statistically  
735 significant  $p$  values for two-tailed  $t$ -test.  
736

737

738



739 **Table**

| Patient                                                | P1                                          | P2                                                   | P3          | P4                                    | P5                        |
|--------------------------------------------------------|---------------------------------------------|------------------------------------------------------|-------------|---------------------------------------|---------------------------|
| <b>Age</b>                                             | 56                                          | 68                                                   | 51          | 56                                    | 52                        |
| <b>Sex</b>                                             | F                                           | F                                                    | M           | M                                     | M                         |
| <b>Race/ethnicity</b>                                  | Hispanic                                    | White/Caucasian                                      | Hispanic    | Black/African-american                | White/Caucasian           |
| <b>Stroke location</b>                                 | R MCA                                       | R MCA                                                | L MCA       | R MCA                                 | R MCA                     |
| <b>NIHSS</b>                                           | 3                                           | N/A                                                  | 21          | N/A                                   | N/A                       |
| <b>Time of recording after stroke</b>                  | 2 days                                      | 2 days                                               | 3 days      | 3 days                                | 3 days                    |
| <b>Comorbidities</b>                                   | COVID                                       | Partial status epilepticus (right temporal)          | ESRD, HFrEF | Pituitary macroadenoma, Central hypoT | Ruptured R MCA aneurysm   |
| <b>Sleep disorders (e.g. obstructive sleep apnoea)</b> | No                                          | No                                                   | No          | No                                    | No                        |
| <b>Circadian rhythm disruption</b>                     | No                                          | No                                                   | No          | No                                    | No                        |
| <b>Alcohol</b>                                         | Yes                                         | No                                                   | N/A         | No                                    | No                        |
| <b>Smoking</b>                                         | No                                          | No                                                   | N/A         | No                                    | No                        |
| <b>Rx (concurrent)</b>                                 | Propofol gtt<br>Dexamethasone<br>Remdesivir | Levetiracetam<br>Acyclovir<br>Vancomycin<br>Cefepime | ASA/Plavix  | ASA<br>Levothyroxine                  | Levetiracetam<br>Levophed |

740  
741 **Table 1. Patient clinical information.** Top to bottom, information for five patients P1 to P5.  
742 Patient age, sex, race/ethnicity, stroke location, NIHSS, days from stroke when the EEG data was  
743 acquired, associated co-morbidities, sleep disorders, circadian rhythm disruption, alcohol and  
744 smoking substance consumption status, and concurrent medications during EEG recording are  
745 specified. Abbreviations; NIHSS: National Institutes of Health Stroke Scale; R/ L MCA: Right/ left  
746 middle cerebral artery; COVID: Coronavirus disease - 2019; ESRD: End-stage renal disease;  
747 HFrEF: Heart failure with reduced ejection fraction; HypoT: hypothyroidism; ASA: Acetylsalicylic  
748 Acid (Aspirin); N/A: not available. Patient groups: **blue**: patients in propofol medication group  
749 (Group-1); **orange**: patients in levetiracetam medication group (Group-2); **green**: patients in other  
750 medication group (Group-3).





# Figure 2

Imaging  
(CT/MRI)

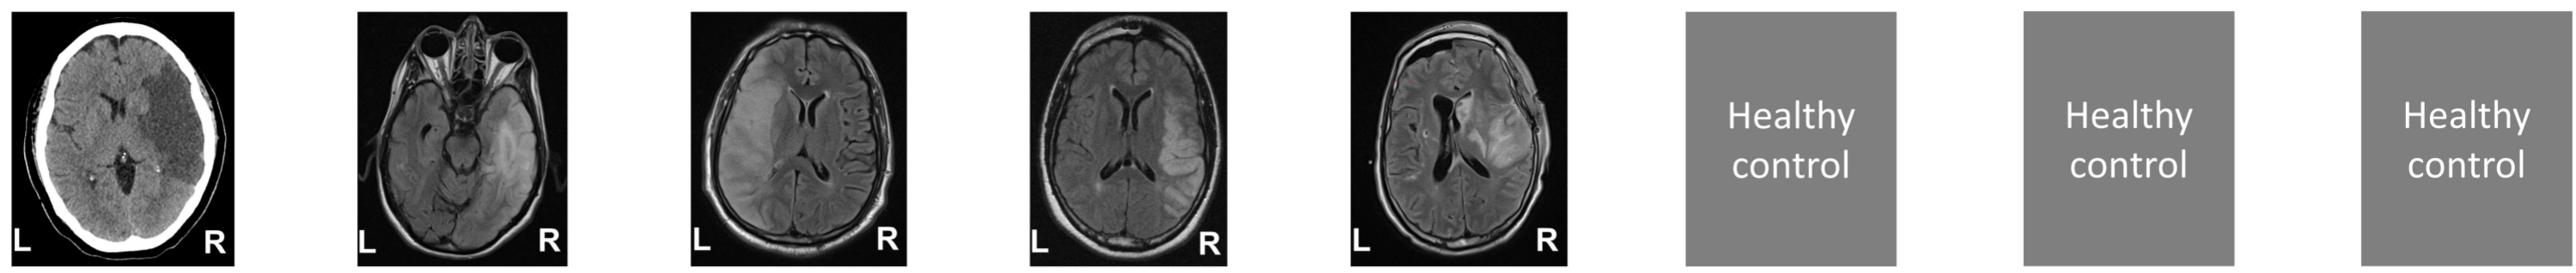

medRxiv preprint doi: <https://doi.org/10.1101/2023.05.01.23289359>; this version posted October 31, 2023. The copyright holder for this preprint (which was not certified by peer review) is the author/funder, who has granted medRxiv a license to display the preprint in perpetuity. It is made available under a [CC-BY-ND 4.0 International license](https://creativecommons.org/licenses/by-nd/4.0/).

Spindles

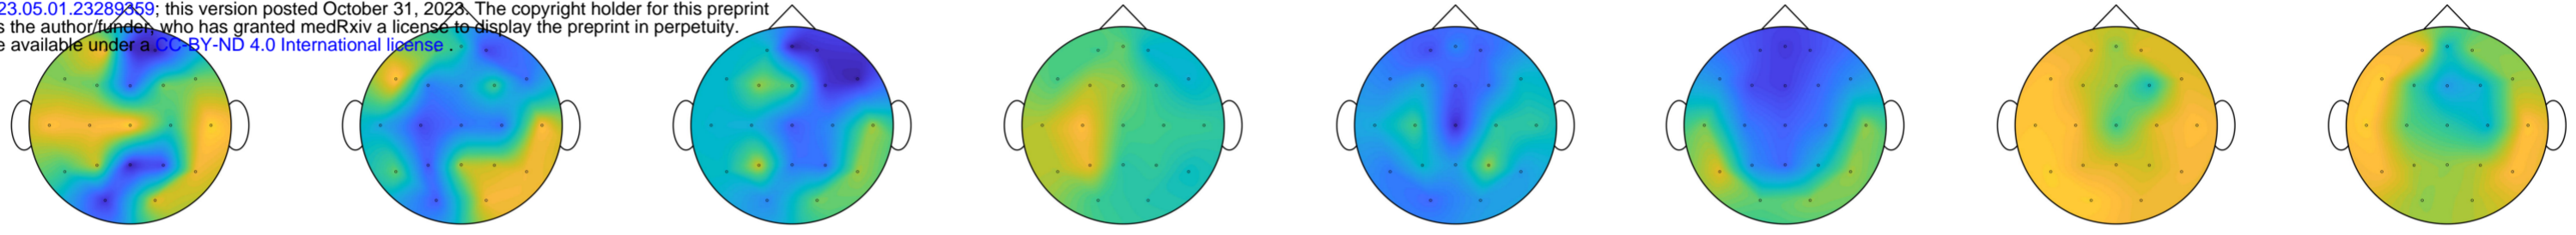

SOs

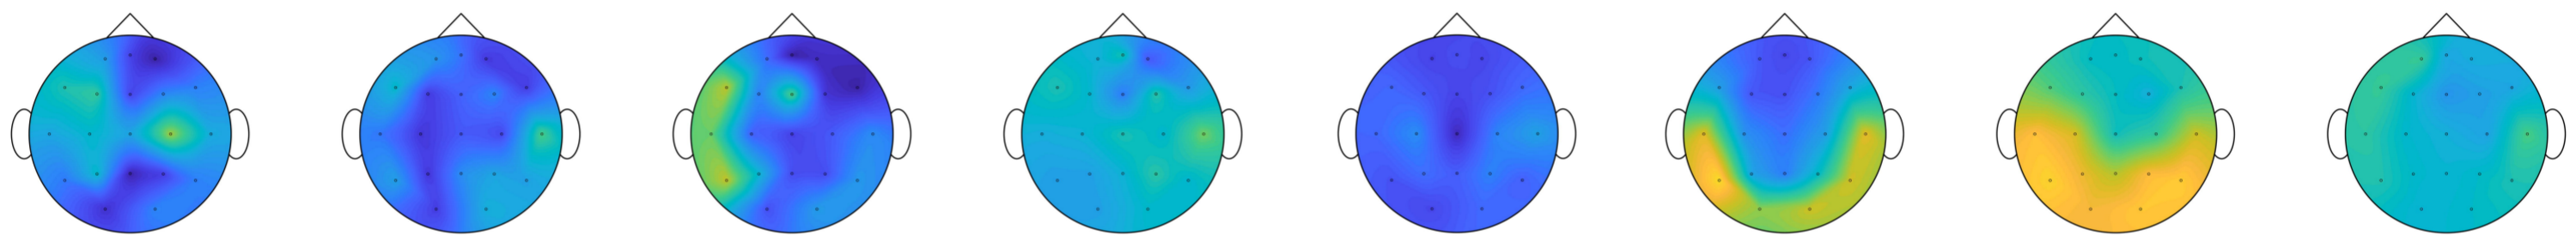

$\delta$  waves

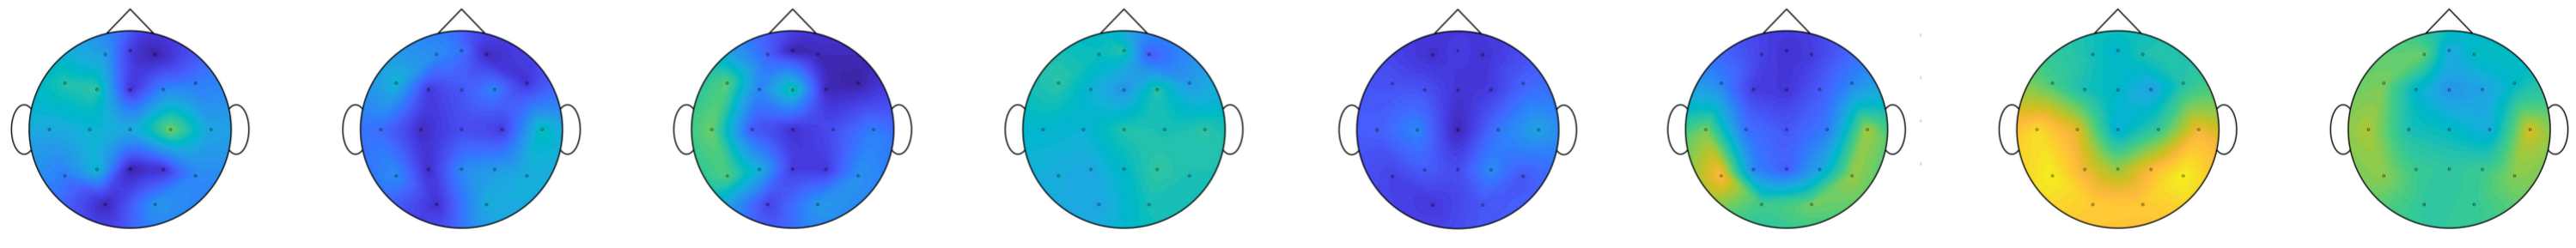

Nested  
SO-Spindles

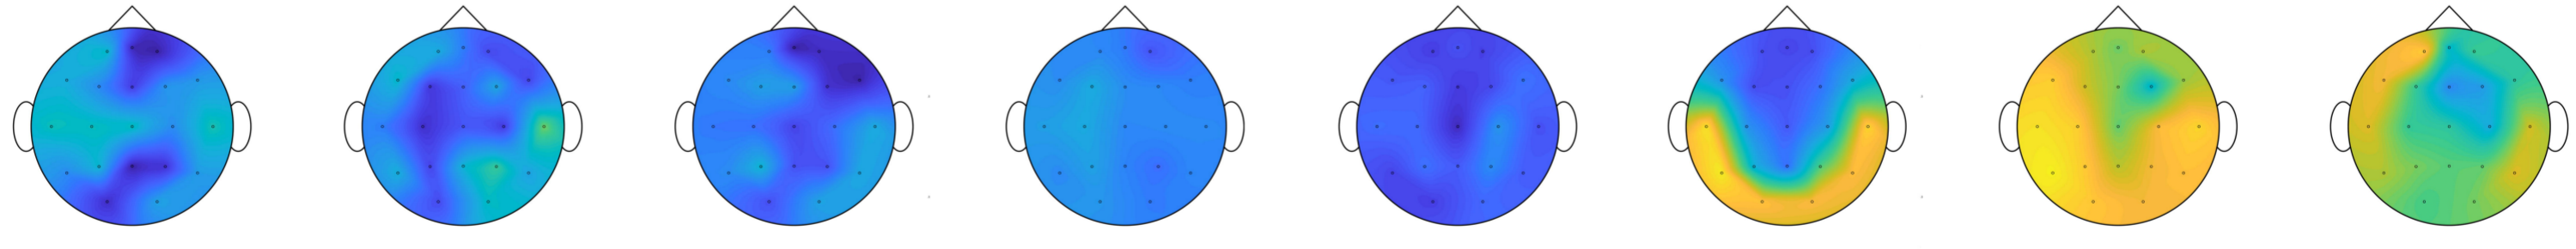

Nested  
 $\delta$  wave-  
Spindles

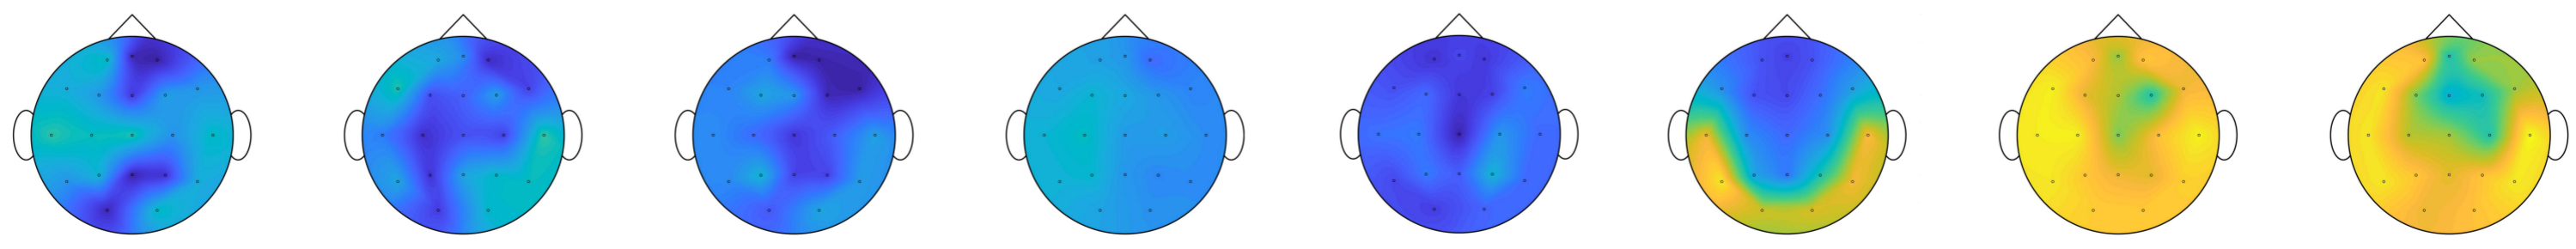

11  
0  
7  
0  
27  
0  
2.4  
0  
9  
0  
Counts/min

# Figure 3

## Laterality index comparison

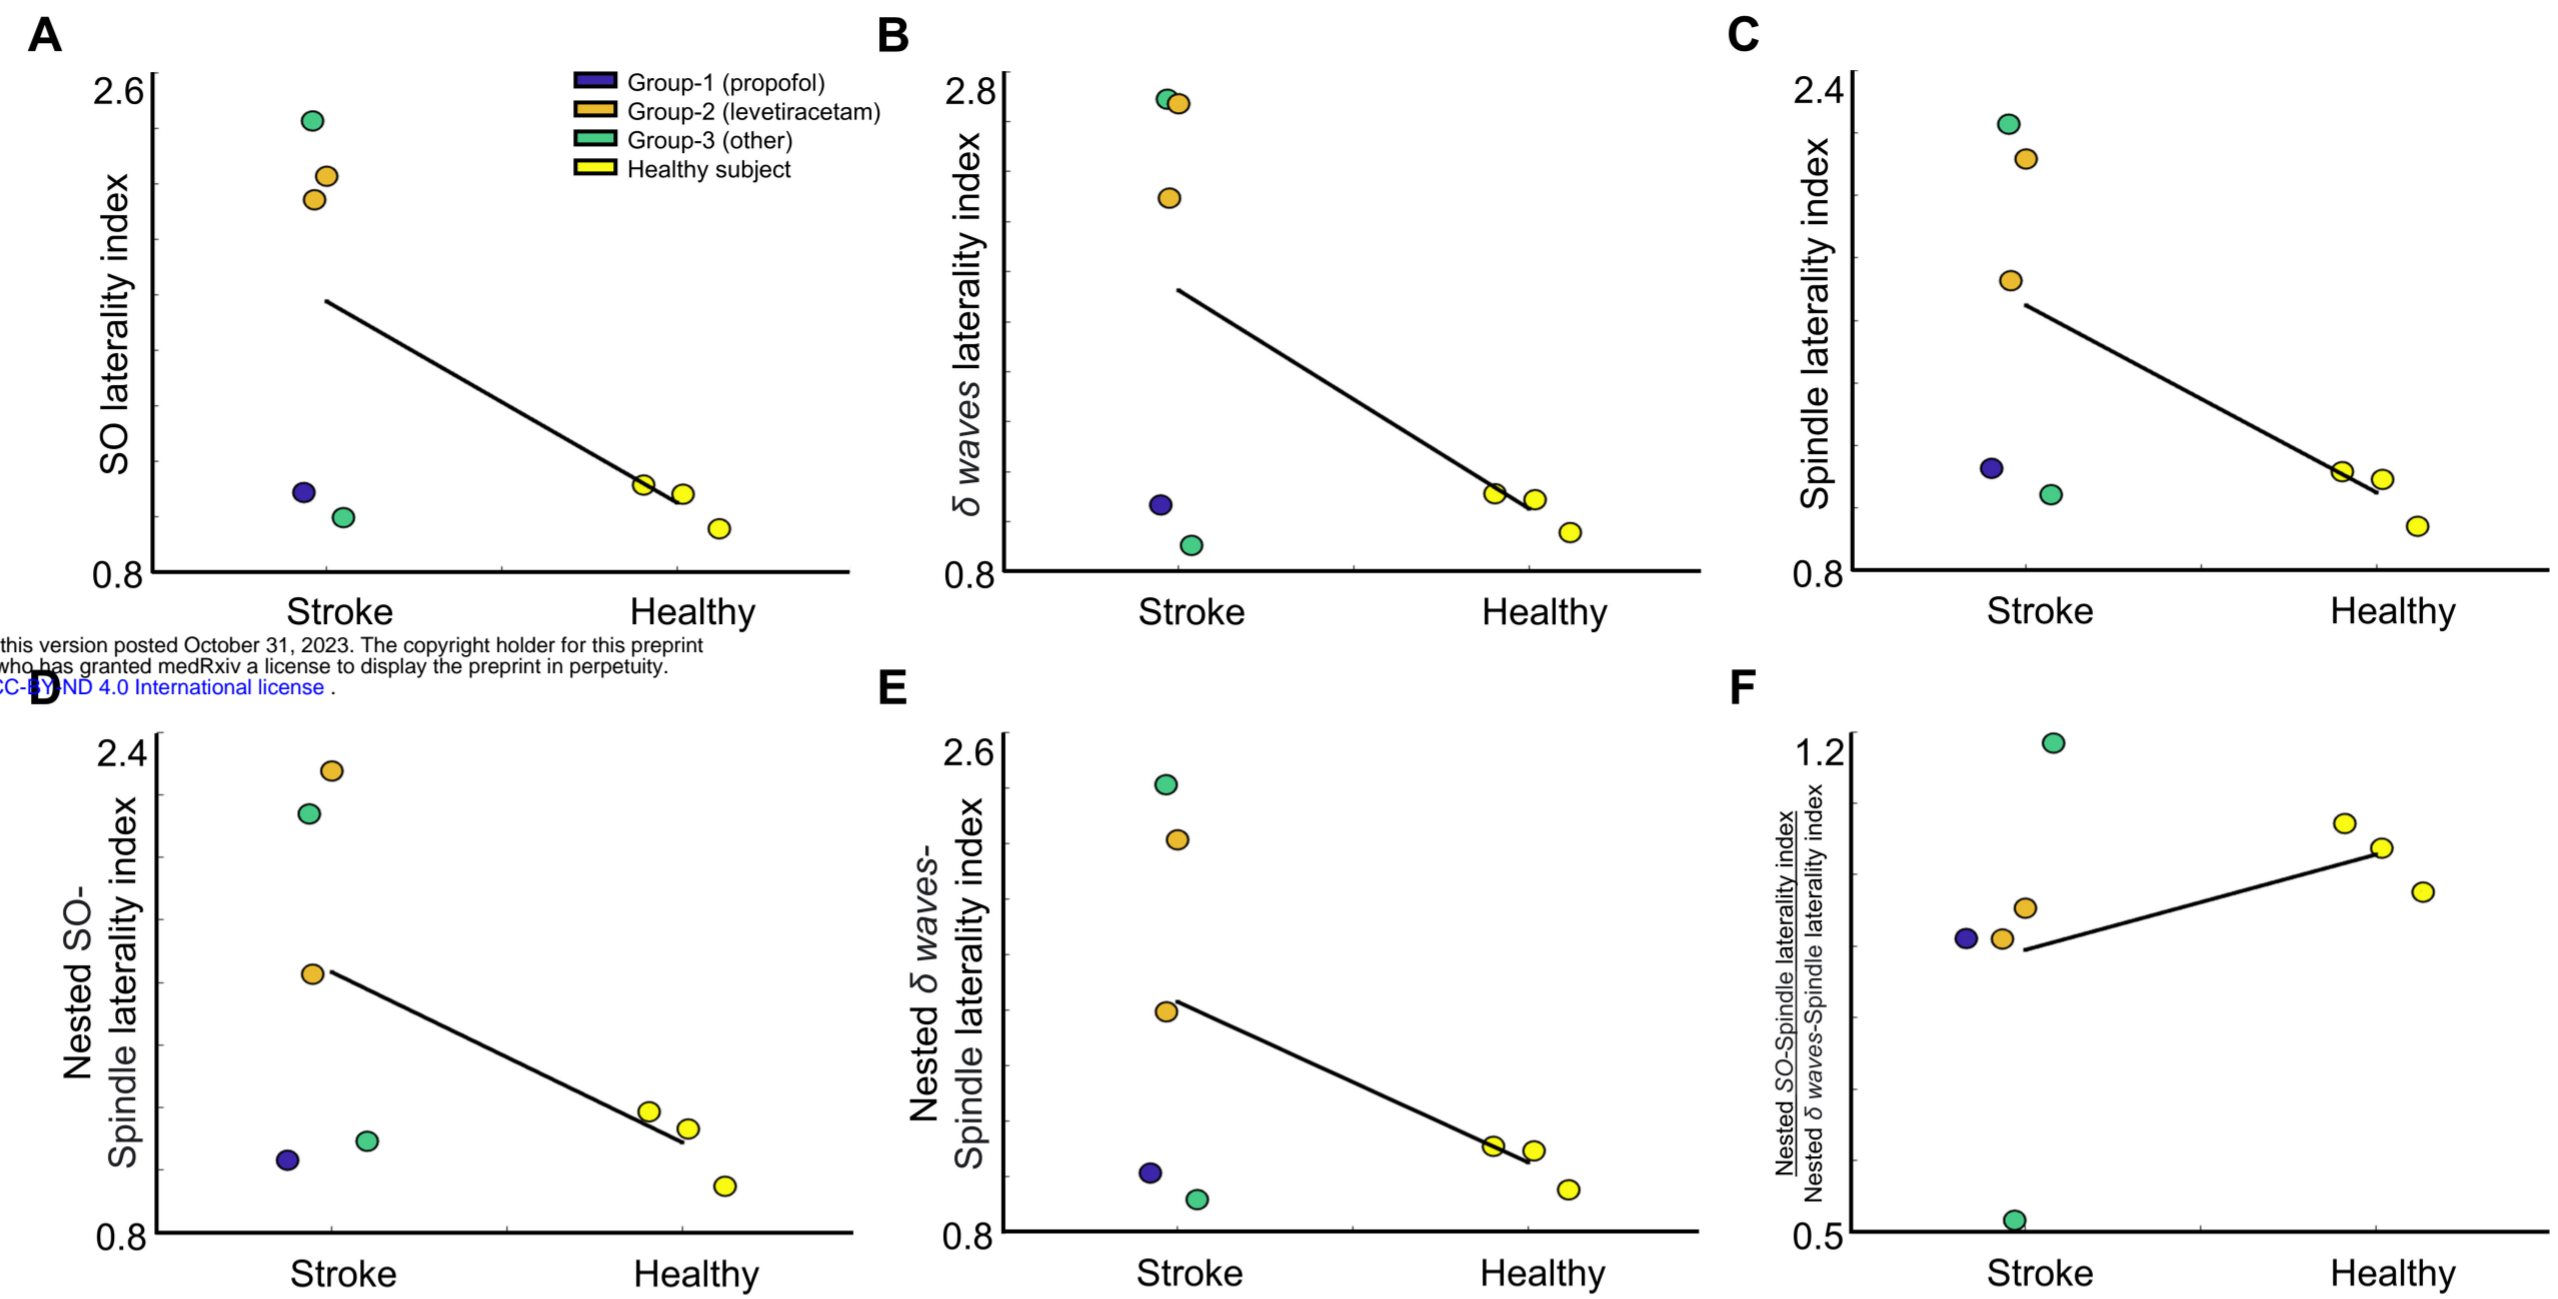

medRxiv preprint doi: <https://doi.org/10.1101/2023.05.01.23289359>; this version posted October 31, 2023. The copyright holder for this preprint (which was not certified by peer review) is the author/funder, who has granted medRxiv a license to display the preprint in perpetuity. It is made available under a [CC-BY 4.0 International license](https://creativecommons.org/licenses/by/4.0/).

## Stroke vs contralateral mirror (CM) electrode comparison

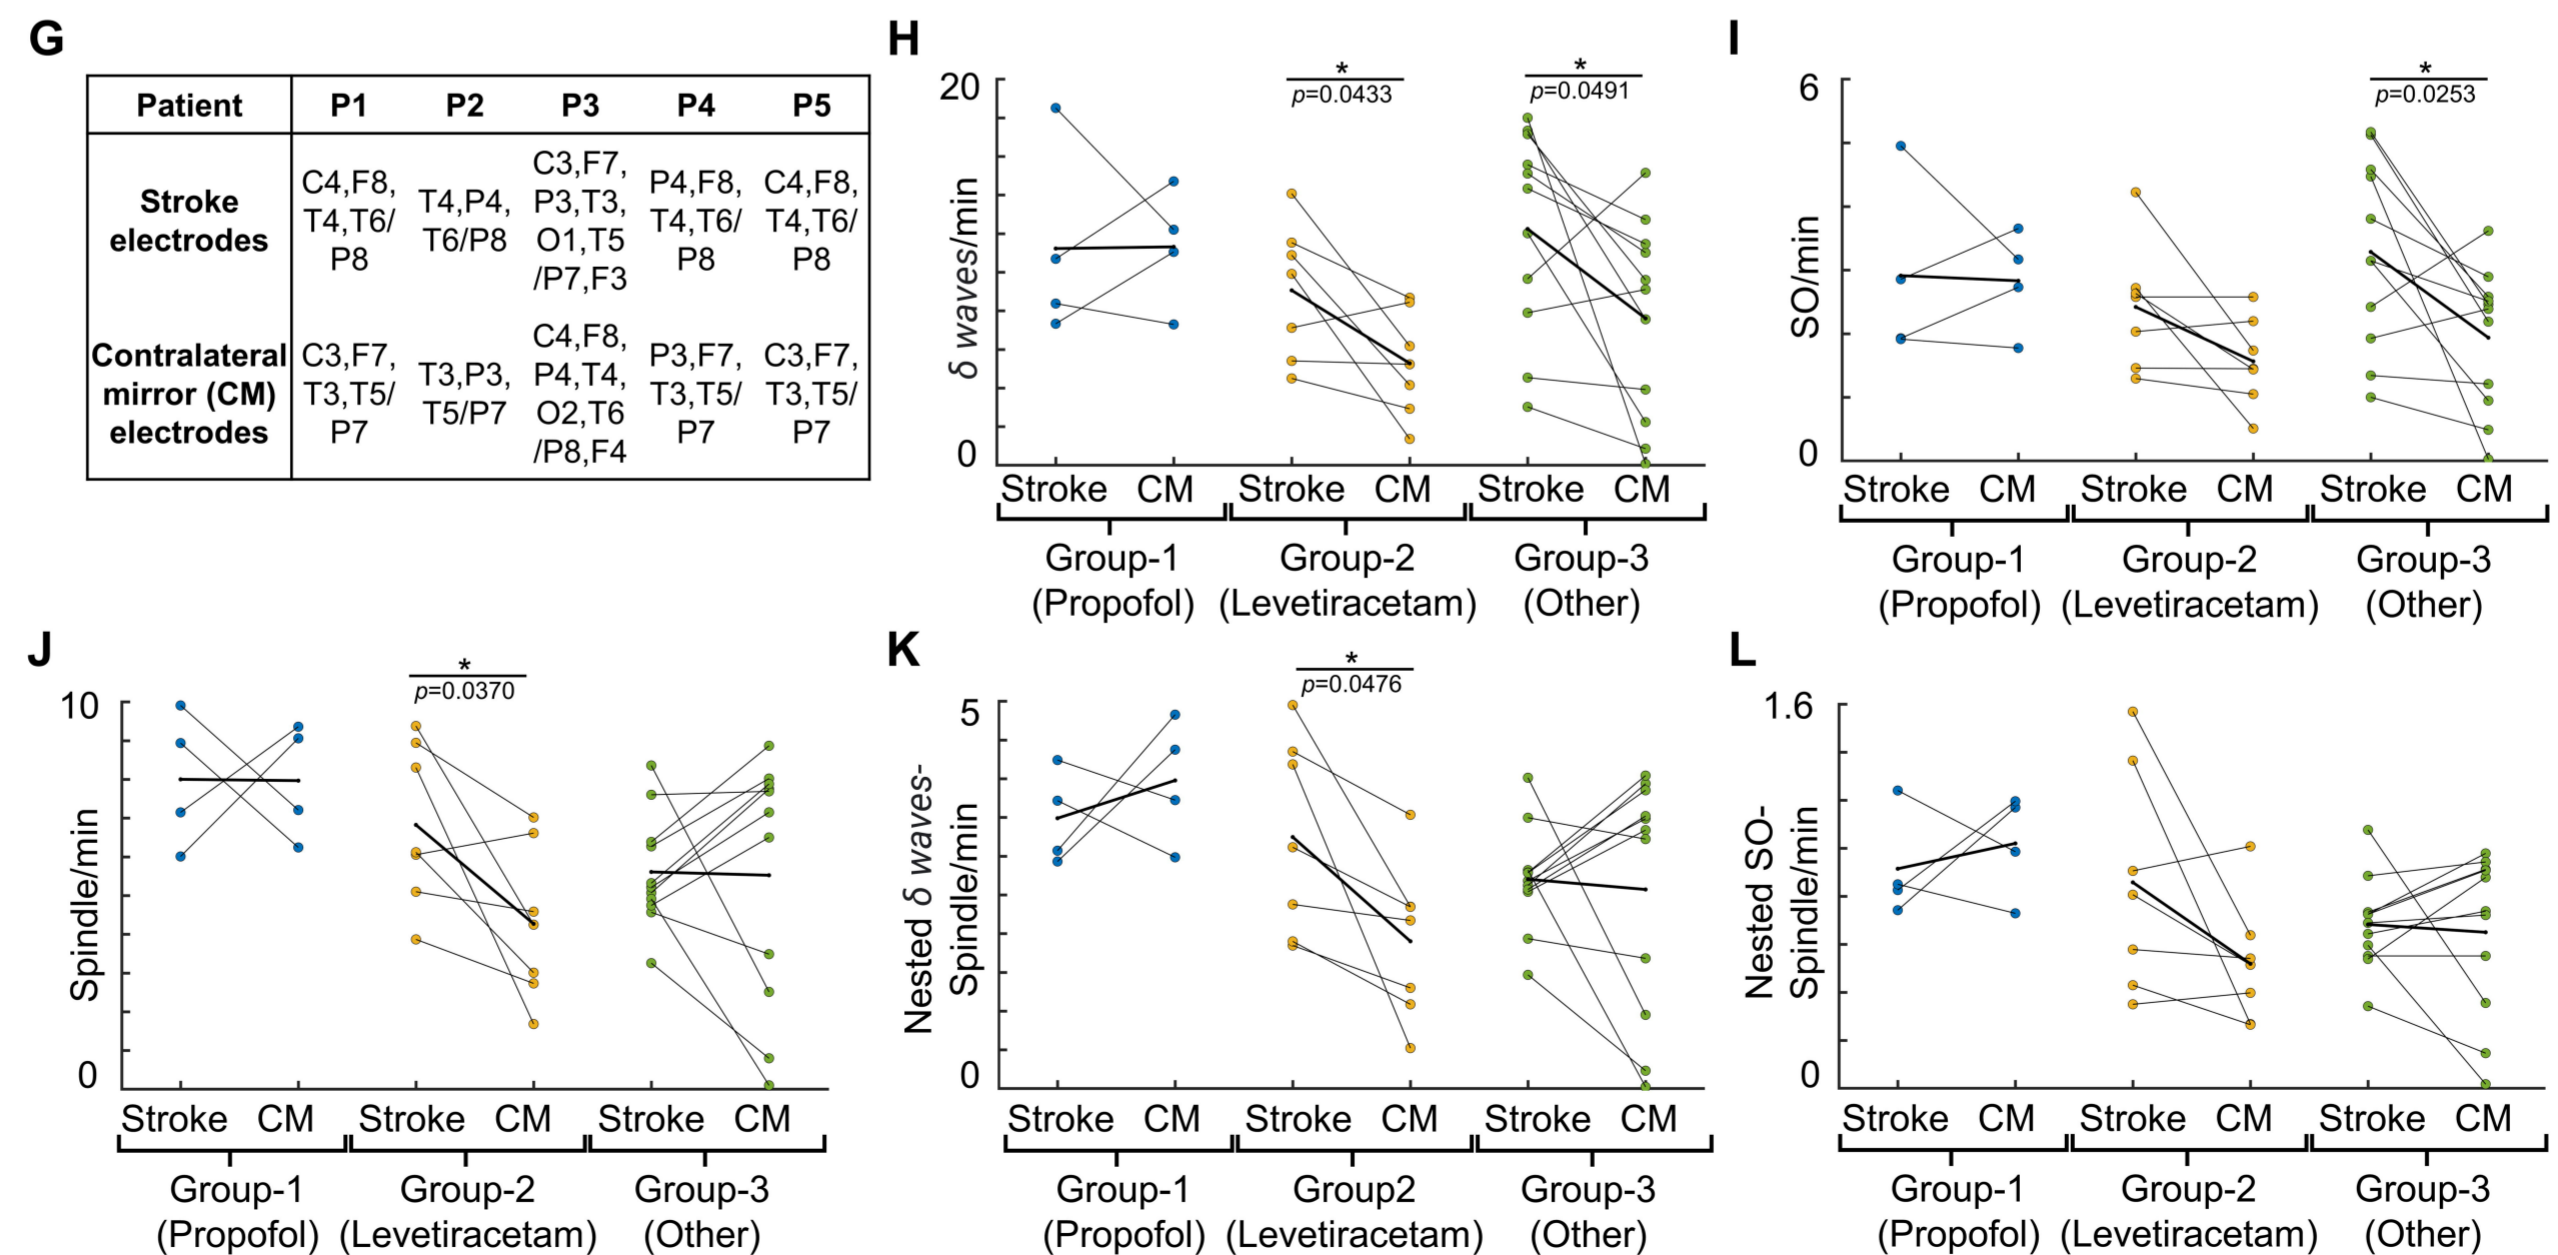

Source: https://medrxiv.org/content/10.1101/2023.05.01.23289359v2.full.pdf
